# Supplementary material for: Kangfuxin Oral Liquid Attenuates Bleomycin-Induced Pulmonary Fibrosis via the TGF-β1/Smad Pathway
Source: Hindawi journal article supplement (doi:10.1155/2019/5124026), 2019-11-03
Supplement: f1 [file 5124026.f1.pdf]

**Supplementary Table 1. Primer sets used for real-time PCR.**

| <b>Gene</b>                | <b>Sense Primer (5' - 3')</b> | <b>Antisense Primer (5' - 3')</b> |
|----------------------------|-------------------------------|-----------------------------------|
| Cyclin D1<br>(Mouse)       | GCGTACCCTGACACCAATCTC         | ACTTGAAGTAAGATACGGAGGGC           |
| p15ink4b<br>(Mouse)        | ATGTTGGGCGGCAGCAGTGACG        | ATCTCCAGTGGCAGCGTGACG             |
| p18ink4c<br>(Mouse)        | GATTTGGGAGAACTGCGCTG          | GCCTGGA ACTCCAGCAAAGC             |
| $\alpha$ -SMA (Mouse)      | AGAACACGGCATCATCAC            | TCCAGAGTCCAGCACAAT                |
| Collagen-III<br>(Mouse)    | TCCTGAAGATGTCGTTGATGTG        | GTCTCATTGCCTTGCGTGTT              |
| p19af <sup>r</sup> (Mouse) | GGGTCGCAGGTTCTTGGTC           | GTGCGGCCCTCTTCTCAA                |
| TGF- $\beta$ 1 (Rat)       | ACCGCAACAACGCAATCTA           | AATGGGGGTTCTGGCACT                |
| GAPDH<br>(Mouse)           | CATGGCCTTCCGTGTTCCCTA         | GCCTGCTTCACCACCTTCTT              |
| GAPDH (Rat)                | GGCAAGTTCAACGGCACA            | TCTCGCTCCTGGAAGATGG               |
